# Supplementary material for: Comparison of electromagnetic navigation bronchoscopic localization and computed tomographic imaging-guided methylene blue localization in the resection of pulmonary nodules: a retrospective cohort study
Source: PeerJ. 2025 Apr 4;13:e19224. doi: 10.7717/peerj.19224 (PMC11974513; doi:10.7717/peerj.19224)
Supplement: Supplemental Information 1 — All the parameters that were studied in this research. [file peerj-13-19224-s001.xlsx]

## Sheet: Sheet1
Serial Number	ENB=0 CT=1	Sex (Male=0, Female=1)	Age (Years)	Height (cm)	Height (m)	Weight (kg)	BMI (kg/m^2)	Smoking History (Never Smoking=0, Smoking Previously=1, Presently Smoking=2)	Family History of cancer (Yes=1, No=0)	Number of Nodules	Maximum Diameter of Nodules (mm)	Distance from Pleura (mm)	Nodular Density (Pure GGO=0, Mixed GGO=1, Solid=2)	Nodule Site (RUL=0, RLL=1, LUL=2 LLL=3)	Tracheal Tract (Right=0, Left=1)	Operative Method (Wedge=0, Segm.=1, W+S=2)	Pathological Type (Adenoma=0, ISAC=1, MIAC=2, IAC=3, SCC=4, BD=5, Met.=6	Incisal Margin (mm)	Supplementary Resection (N0=0, Yes=1)	Colour Success (Yes=0, No=1)	Hemoptysis (No=0, Yes=1)	Hemopneumothorax (No=1, Yes=1)
1	0	1	59	165	1.65	65	23.8751	0	1	1	10	16.56	1	1	0	0	2	10	1	1	0	0
2	0	0	53	171	1.71	82	28.0428	0	0	1	11	9.48	1	1	0	1	1	15	0	1	0	0
3	0	1	56	157	1.57	48	19.4734	0	0	1	13	0	1	1	0	0	1	10	0	1	0	0
4	0	1	54	165	1.65	65	23.8751	0	0	1	6	26.57	1	3	1	1	1	10	0	1	0	0
5	0	1	33	150	1.5	48	21.3333	0	0	1	7	19.65	1	3	0	1	1	15	0	1	0	0
6	0	1	67	154	1.54	52.5	22.137	0	0	2	11	3.1	0	3	0	0	1 & 3	20	0	1	0	0
7	0	1	48	164	1.64	55	20.4491	0	0	1	9	14.81	2	3	1	0	6	15	0	1	0	0
8	0	0	25	178	1.78	60	18.937	0	0	1	15	8.34	1	0	0	1	2	30	0	0	0	0
9	0	1	63	150	1.5	50	22.2222	0	0	2	7	0	1	0	0	1	2 & 0	15	0	0	0	0
10	0	0	50	176	1.76	88	28.4091	0	1	1	7	19.85	0	0	0	1	1	16	0	0	0	0
11	0	1	40	167	1.67	66	23.6652	0	0	1	12	15	1	0	0	1	2	18	0	0	0	0
12	0	0	73	160	1.6	60	23.4375	1	0	1	8	2.04	1	0	0	0	3	13	0	0	0	0
13	0	1	52	157	1.57	53	21.5019	0	0	1	9	9.39	1	0	0	1	2	20	0	0	0	0
14	0	1	50	152	1.52	52	22.5069	0	0	1	6	18	1	0	0	0	1	15	0	0	0	0
15	0	0	70	165	1.65	76	27.9155	0	0	2	13	0	1	0	0	0	3	5	1	0	0	0
16	0	1	67	155	1.55	55	22.8928	0	0	2	25	1	1	0	0	1	1	16	0	0	0	0
17	0	0	33	165	1.65	74	27.1809	0	0	1	10	26.99	1	0	0	1	3	30	0	0	0	0
18	0	1	59	158	1.58	60	24.0346	0	1	1	14	0	1	0	1	0	3	15	0	0	0	0
19	0	1	57	164	1.64	55	20.4491	0	0	1	15	11.53	1	0	1	1	3	12	0	0	0	0
20	0	1	34	162	1.62	50	19.052	0	0	1	5	6.7	0	0	0	0	1	15	0	0	0	0
21	0	1	50	160	1.6	56	21.875	0	0	3	8	12.62	1	0	0	0	1	15	0	0	0	0
22	0	1	50	155	1.55	60	24.974	0	0	2	7	1.55	0	0	0	0	1 & 5	10	0	0	0	0
23	0	1	56	165	1.65	71	26.079	0	0	1	15	0	1	0	0	1	2	20	0	0	0	0
24	0	0	52	174	1.74	73	24.1115	0	0	1	11	3.3	1	0	0	1	2	17	0	0	0	0
25	0	1	35	158	1.58	52	20.83	0	0	1	9	0	1	0	0	1	1	20	0	0	0	0
26	0	1	34	166	1.66	60	21.7738	0	0	1	15	3.5	2	0	1	0	5	10	0	0	0	0
27	0	1	62	160	1.6	60	23.4375	0	0	2	6	7.24	1	0	0	0	0 & 1	10	0	0	0	0
28	0	1	64	158	1.58	62	24.8358	0	0	1	15	4.68	1	0	0	1	5	13	0	0	0	0
29	0	0	51	178	1.78	88	27.7743	1	0	1	7	12.41	1	0	0	1	2	12	0	0	0	0
30	0	1	67	150	1.5	45	20	0	0	2	13	0	1	0	0	0	1 & 3	52	0	0	0	0
31	0	1	55	152	1.52	50	21.6413	0	0	1	6	0	0	0	0	1	2	13	0	0	0	0
32	0	1	65	152	1.52	52	22.5069	0	0	4	10	0	1	0	0	0	1	15	0	0	0	0
33	0	0	40	180	1.8	88	27.1605	0	0	1	8	12.75	1	0	0	1	1	40	0	0	0	0
34	0	0	76	165	1.65	74	27.1809	0	0	1	8	11.32	1	0	0	0	1	20	0	0	0	0
35	0	0	45	163	1.63	65	24.4646	0	0	1	6	43.83	1	0	0	1	3	18	0	0	0	0
36	0	1	28	165	1.65	55	20.202	0	0	1	5	16.72	1	0	1	1	1	22	0	0	0	0
37	0	1	57	165	1.65	56	20.5693	0	0	1	7	4	1	0	0	0	2	20	0	0	0	0
38	0	1	55	162	1.62	52.5	20.0046	0	0	1	10	0	1	0	0	1	2	20	0	0	0	0
39	0	0	53	184	1.84	74	21.8573	1	0	1	20	0	1	0	0	0	3	20	0	0	0	0
40	0	1	50	163	1.63	70	26.3465	0	0	1	10	6.2	1	0	0	1	3	15	0	0	0	0
41	0	1	44	155	1.55	53	22.0604	0	0	1	12	4	1	0	0	1	0	20	0	0	0	0
42	0	1	55	160	1.6	64	25	0	1	1	6	32.2	1	0	0	0	2	32	0	0	0	0
43	0	1	28	167	1.67	57.5	20.6174	0	0	1	8	7	1	0	0	1	2	10	0	0	0	0
44	0	1	64	155	1.55	60	24.974	0	0	1	9	6.46	0	0	0	1	1	40	0	0	0	0
45	0	1	42	162	1.62	62	23.6244	0	0	1	9	0	1	0	0	0	1	12	0	0	0	0
46	0	1	32	163	1.63	64	24.0882	0	0	1	7	5.75	1	0	0	0	2	20	0	0	0	0
47	0	0	72	169	1.69	70	24.5089	1	1	1	6	23.9	1	0	0	0	2	15	0	0	0	0
48	0	1	44	158	1.58	54	21.6311	0	0	3	10	2	0	0	0	1	1 & 1 & 2	20	0	0	0	0
49	0	1	68	158	1.58	62	24.8358	0	0	1	6	11.5	1	0	0	0	1	20	0	0	0	0
50	0	1	60	164	1.64	49	18.2183	0	0	1	9	6.19	0	0	0	1	2	14	0	0	0	0
51	0	1	52	158	1.58	59	23.634	0	1	1	15	15.69	1	0	1	0	2	22	0	0	0	0
52	0	1	68	162	1.62	56	21.3382	0	0	1	7	0	0	0	0	0	1	15	0	0	0	0
53	0	1	41	168	1.68	59	20.9042	0	0	1	6	13.13	0	0	0	1	1	16	0	0	0	0
54	0	1	57	162	1.62	55	20.9572	0	0	1	8	10.89	1	0	0	1	2	32	0	0	0	0
55	0	0	72	171	1.71	70	23.939	0	0	1	10	2	1	0	0	0	2	18	0	0	0	0
56	0	0	64	178	1.78	65	20.5151	1	0	2	20	2	2	0	0	0	3 & 3	20	0	0	0	0
57	0	0	60	178	1.78	87	27.4587	0	1	1	6	5	1	0	0	1	3	20	0	0	0	0
58	0	0	58	168	1.68	58	20.5499	2	0	1	5	5	0	0	0	0	1	15	0	0	0	0
59	0	1	53	161	1.61	56	21.6041	0	0	1	8	4	0	0	0	1	2	20	0	0	0	0
60	0	1	41	162	1.62	60	22.8624	0	1	1	10	14.04	1	0	0	1	2	32	0	0	0	0
61	0	1	49	160	1.6	65	25.3906	0	0	1	12	9.97	2	0	0	0	6	20	0	0	0	0
62	0	1	29	167	1.67	54	19.3625	0	1	1	7	2.3	0	0	0	0	1	20	0	0	0	0
63	0	1	60	162	1.62	54	20.5761	0	0	1	7	0	0	0	0	0	2	15	0	0	0	0
64	0	1	66	168	1.68	71	25.1559	0	0	1	11	17.51	1	0	0	1	3	63	0	0	0	0
65	0	0	50	180	1.8	92	28.3951	0	0	2	14	0	2	0	0	0	5	20	0	0	0	0
66	0	1	44	160	1.6	56	21.875	0	0	3	6	5	1	0	0	0	1	15	0	0	0	0
67	0	0	60	174	1.74	76	25.1024	0	0	1	11	18.06	0	0	0	0	5	20	0	0	0	0
68	0	1	67	160	1.6	66	25.7812	0	0	1	11	0	1	0	0	0	2	12	0	0	0	0
69	0	0	55	174	1.74	65	21.4692	0	0	1	10	14.99	0	0	0	1	2	25	0	0	0	0
70	0	1	52	157	1.57	50.5	20.4876	0	1	1	10	0	1	0	0	1	1	20	0	0	0	0
71	0	1	28	155	1.55	45	18.7305	0	0	1	6	10	2	0	0	1	2	23	0	0	0	0
72	0	1	56	162	1.62	42	16.0037	0	0	1	9	12.02	0	0	0	1	1	20	0	0	0	0
73	0	1	60	158	1.58	46	18.4265	0	0	2	7	0	1	0	0	1	1 & 2	13	0	0	0	0
74	0	0	57	168	1.68	68	24.093	0	1	1	12	25.59	1	0	1	0	1	28	0	0	0	0
75	0	1	73	160	1.6	59	23.0469	0	0	2	15	0	0	0	0	0	1	30	0	0	0	0
76	0	1	48	155	1.55	64	26.6389	0	0	1	10	0	0	0	0	0	5	20	0	0	0	0
77	0	1	54	154	1.54	50.5	21.2936	0	0	1	8	35	0	0	0	1	1	15	0	0	0	0
78	0	1	40	160	1.6	68	26.5625	0	1	1	7	15	0	0	0	0	1	20	0	0	0	0
79	0	1	44	159	1.59	46	18.1955	0	0	1	8	0	0	0	0	0	1	20	0	0	0	0
80	0	0	49	175	1.75	81	26.449	1	0	1	8	2	0	0	0	1	1	15	1	0	0	0
81	0	0	79	168	1.68	72	25.5102	0	0	1	9	3	1	0	0	0	2	25	0	0	0	0
82	0	1	40	162	1.62	59	22.4813	0	0	1	7	2.03	1	0	0	0	2	8	0	0	0	0
83	0	1	32	170	1.7	76	26.2976	0	0	1	13	0	1	0	0	0	5	20	0	0	0	0
84	0	1	64	167	1.67	75	26.8923	0	0	1	12	3	0	0	0	1	3	55	0	0	0	0
85	0	1	47	163	1.63	55	20.7008	0	0	1	6	3	0	0	0	0	1	20	0	0	0	0
86	0	0	54	178	1.78	78.5	24.7759	2	0	1	16	10.99	2	0	0	0	3	20	0	0	0	0
87	0	1	61	167	1.67	58	20.7967	0	1	1	22	3	1	0	0	0	2	20	0	0	0	0
88	0	0	53	167	1.67	70	25.0995	0	1	1	7	12.27	0	0	0	1	2	12	0	0	0	0
89	0	1	68	163	1.63	57	21.4536	0	0	1	15	4.14	0	0	0	0	3	15	0	0	0	0
90	0	1	36	163	1.63	75	28.2284	0	0	1	5	2	0	0	0	0	1	22	0	0	0	0
91	0	1	37	160	1.6	46	17.9687	0	0	1	15	4	1	0	0	0	3	15	0	0	0	0
92	0	0	54	170	1.7	78	26.9896	0	0	1	10	0	2	0	0	0	5	15	0	0	0	0
93	0	1	66	156	1.56	48.5	19.9293	0	0	1	10	2	1	0	0	1	2	23	0	0	0	0
94	0	1	63	147	1.47	46	21.2874	0	1	3	5	2	1	0	0	1	1	15	0	0	0	0
95	0	1	47	164	1.64	78	29.0006	0	0	2	6	8.21	0	0	0	0	0 & 2	16	0	0	0	0
96	0	0	62	180	1.8	75	23.1481	0	0	1	15	6.5	0	1	1	1	2	20	0	0	0	0
97	0	0	55	160	1.6	47	18.3594	0	0	1	15	17.6	2	1	1	0	5	15	0	0	0	0
98	0	1	50	158	1.58	47.5	19.0274	0	0	1	9	19.53	0	1	0	1	1	15	0	0	0	0
99	0	0	67	168	1.68	75	26.5731	0	0	2	8	15.92	2	1	0	1	1 & 5	12	0	0	0	0
100	0	1	36	168	1.68	80	28.3447	0	0	2	8	15.35	0	1	0	0	1	18	0	0	0	0
101	0	0	64	172	1.72	72	24.3375	1	1	1	10	18.76	1	1	1	0	2	10	0	0	0	0
102	0	1	50	165	1.65	52	19.1001	0	0	1	4	16.25	0	1	0	1	5	20	1	0	0	0
103	0	1	48	158	1.58	55	22.0317	0	1	1	10	41.54	1	1	1	1	2	15	0	0	0	0
104	0	1	38	163	1.63	51	19.1953	0	0	1	13	17.21	0	1	0	1	1	30	0	0	0	0
105	0	1	46	162	1.62	55	20.9572	0	0	1	9	0	1	1	0	0	3	28	0	0	0	0
106	0	1	53	173	1.73	69	23.0546	0	0	1	6	0	1	1	0	0	2	10	0	0	0	0
107	0	1	49	160	1.6	52	20.3125	0	0	1	5	2.84	1	1	0	0	2	16	0	0	0	0
108	0	1	54	160	1.6	72	28.125	0	1	1	8	5.36	1	1	0	0	2	20	0	0	0	0
109	0	1	49	160	1.6	60	23.4375	0	0	1	9	32.85	0	1	0	1	2	30	0	0	0	0
110	0	1	44	165	1.65	60	22.0386	0	0	1	11	3	1	1	0	0	3	20	0	0	0	0
111	0	0	76	170	1.7	75	25.9516	0	0	1	7	23.96	1	1	0	1	0	40	0	0	0	0
112	0	1	59	158	1.58	63	25.2363	0	0	1	8	13.23	1	1	0	1	5	50	0	0	0	0
113	0	1	59	168	1.68	65	23.03	0	0	1	6	2	1	1	0	1	1	8	1	0	0	0
114	0	1	65	162	1.62	74	28.1969	0	0	1	12	6	0	1	0	0	3	20	0	0	0	0
115	0	0	56	165	1.65	65	23.8751	1	0	1	11	0	2	1	1	0	5	20	0	0	0	0
116	0	1	48	160	1.6	60	23.4375	0	0	1	9	0	0	1	0	0	1	20	0	0	0	0
117	0	1	69	158	1.58	51.5	20.6297	0	1	2	4	10	0	1	0	0	1 & 2	15	0	0	0	0
118	0	0	51	162	1.62	62	23.6244	0	0	1	21	5	1	1	0	0	5	21	0	0	0	0
119	0	1	39	170	1.7	55	19.0311	0	1	1	7	23.92	1	1	0	0	1	5	1	0	0	0
120	0	1	55	165	1.65	52.5	19.2837	0	0	1	11	0	1	1	0	1	3	8	0	0	0	0
121	0	0	74	168	1.68	70	24.8016	0	0	1	33	0	1	1	0	1	3	11	0	0	0	0
122	0	1	49	170	1.7	90	31.1419	0	1	1	12	17.91	1	1	1	0	3	23	0	0	0	0
123	0	1	38	168	1.68	60	21.2585	0	0	1	7	0	1	1	0	1	2	18	0	0	0	0
124	0	0	58	180	1.8	82	25.3086	1	1	1	12	11.13	0	1	0	1	3	30	0	0	0	0
125	0	1	58	165	1.65	43	15.7943	0	0	1	7	18.5	1	1	0	1	2	34	0	0	0	0
126	0	1	68	160	1.6	55	21.4844	0	0	1	15	3	2	1	0	1	3	12	0	0	0	0
127	0	1	56	158	1.58	58	23.2335	0	0	1	14	5.28	1	1	0	0	3	20	0	0	0	0
128	0	1	38	160	1.6	52	20.3125	0	0	1	6	7.33	2	1	0	1	5	11	0	0	0	0
129	0	1	73	158	1.58	63	25.2363	0	0	1	15	0	1	1	0	0	3	15	0	0	0	0
130	0	1	43	152	1.52	55	23.8054	0	1	1	6	0	0	1	0	0	2	25	0	0	0	0
131	0	1	47	156	1.56	56	23.0112	0	0	1	7	4	2	1	1	1	6	25	0	0	0	0
132	0	1	30	163	1.63	64	24.0882	0	0	2	6	20	0	1	0	0	1	20	0	0	0	0
133	0	0	62	173	1.73	60	20.0474	0	0	1	3	3	1	1	0	0	5	15	0	0	0	0
134	0	0	53	168	1.68	67	23.7387	0	0	1	3	0	0	1	0	0	2	27	0	0	0	0
135	0	1	46	156	1.56	70	28.764	0	0	2	3	9.4	2	1	1	0	2 & 3	6	0	0	0	0
136	0	1	45	168	1.68	60	21.2585	0	0	1	11	6.44	1	1	0	1	1	15	0	0	0	0
137	0	1	59	160	1.6	62	24.2187	0	1	1	18	12.17	2	1	0	0	5	20	0	0	0	0
138	0	0	51	175	1.75	75	24.4898	0	0	1	7	3	1	1	0	0	2	15	0	0	0	0
139	0	1	71	156	1.56	52	21.3675	0	0	1	7	25	1	1	1	0	2	19	0	0	0	0
140	0	1	34	162	1.62	59	22.4813	0	0	1	7	4	1	1	0	0	1	18	0	0	0	0
141	0	0	59	172	1.72	71	23.9995	0	0	1	8	2	1	1	0	0	2	16	0	0	0	0
142	0	0	34	177	1.77	70	22.3435	0	0	1	10	4	2	1	0	0	5	15	0	0	0	0
143	0	1	59	158	1.58	50	20.0288	0	0	3	6	18.74	1	1	1	0	2	40	0	0	0	0
144	0	0	58	170	1.7	71	24.5675	2	0	1	18	2	1	1	1	0	3	20	0	0	0	0
145	0	1	64	158	1.58	75.5	30.2436	0	0	2	15	12.87	1	2	1	1	3	25	0	0	0	0
146	0	1	53	167	1.67	57.5	20.6174	0	1	1	5	5.26	0	2	0	0	1	20	0	0	0	0
147	0	1	53	153	1.53	54	23.0681	0	0	1	11	3.19	1	2	0	1	2	15	0	0	0	0
148	0	0	52	168	1.68	75	26.5731	0	1	2	9	23.73	1	2	0	1	2	30	0	0	0	0
149	0	0	43	178	1.78	65	20.5151	0	0	1	9	22.08	1	2	0	1	2	20	0	0	0	0
150	0	1	60	155	1.55	50	20.8117	0	0	2	11	21.16	0	2	1	1	3 & 5	8	0	0	0	0
151	0	0	54	176	1.76	75	24.2123	2	0	1	9	7.35	1	2	0	1	2	20	0	0	0	0
152	0	1	56	156	1.56	60	24.6548	0	0	1	8	13.25	1	2	0	0	1	10	0	0	0	0
153	0	1	62	160	1.6	51	19.9219	0	1	1	5	3.18	1	2	0	1	1	12	0	0	0	0
154	0	0	64	163	1.63	65	24.4646	1	1	1	9	0	1	2	0	1	2	24	0	0	0	0
155	0	1	65	164	1.64	51	18.9619	0	0	1	16	0	1	2	0	0	3	20	0	0	0	0
156	0	0	59	171	1.71	68	23.255	0	0	1	12	1	0	2	0	0	2	20	0	0	0	0
157	0	1	60	160	1.6	55	21.4844	0	0	1	15	3.86	1	2	0	0	3	10	0	0	0	0
158	0	1	68	163	1.63	57.5	21.6418	0	0	1	13	0	1	2	1	1	1	15	0	0	0	0
159	0	1	51	160	1.6	56	21.875	0	0	1	10	0	1	2	0	1	1	15	0	0	0	0
160	0	0	56	153	1.53	54	23.0681	0	0	1	22	5	1	2	1	1	3	20	0	0	0	0
161	0	1	26	158	1.58	47	18.8271	0	0	1	5	0	0	2	0	0	1	10	0	0	0	0
162	0	1	60	153	1.53	59	25.204	0	0	1	7	0	2	2	0	0	2	10	0	0	0	0
163	0	1	34	158	1.58	49	19.6283	0	0	1	6	9.57	0	2	0	0	1	35	0	0	0	0
164	0	0	58	168	1.68	52	18.424	1	0	1	8	6.01	0	2	0	0	1	20	0	0	0	0
165	0	0	49	171	1.71	100	34.1986	1	0	1	15	11.29	1	2	0	0	3	20	0	0	0	0
166	0	1	60	160	1.6	73	28.5156	0	0	1	12	0	1	2	0	1	3	15	0	0	0	0
167	0	1	68	160	1.6	56	21.875	0	0	1	15	0	1	2	0	0	3	20	0	0	0	0
168	0	1	42	162	1.62	60	22.8624	0	0	1	6	6.9	1	2	0	1	2	15	0	0	0	0
169	0	0	52	175	1.75	79	25.7959	1	0	1	11	10.34	0	2	0	1	2	25	0	0	0	0
170	0	0	74	162	1.62	65	24.7676	1	0	1	16	3	2	2	0	1	4	35	0	0	0	0
171	0	0	62	162	1.62	60	22.8624	0	0	2	14	0	1	2	1	1	1 & 2	40	0	0	0	0
172	0	0	69	163	1.63	70	26.3465	0	0	1	15	14.52	1	2	1	0	3	20	0	0	0	0
173	0	1	48	161	1.61	65	25.0762	0	0	1	15	6.17	1	2	1	0	3	20	0	0	0	0
174	0	1	59	157	1.57	54	21.9076	0	0	1	10	0	1	2	0	1	1	35	0	0	0	0
175	0	1	57	164	1.64	55	20.4491	0	0	1	9	1	1	2	0	1	2	24	0	0	0	0
176	0	0	55	178	1.78	70	22.0932	1	0	1	12	0	2	2	1	0	3	22	0	0	0	0
177	0	0	42	172	1.72	64	21.6333	0	0	1	8	5.18	1	2	0	0	2	16	0	0	0	0
178	0	1	67	158	1.58	49	19.6283	0	0	1	25	4	1	2	1	1	3	17	0	0	0	0
179	0	1	38	160	1.6	63.5	24.8047	0	0	1	6	6	1	2	0	1	1	30	0	0	0	0
180	0	0	59	172	1.72	80	27.0416	1	0	1	7.5	0	2	2	0	0	5	20	0	0	0	0
181	0	1	44	165	1.65	80	29.3848	0	0	1	5	0	1	2	0	0	2	15	0	0	0	0
182	0	1	60	165	1.65	58.5	21.4876	0	0	1	10	29.79	1	2	1	0	2	15	0	0	0	0
183	0	1	56	160	1.6	65	25.3906	0	1	1	22	0	1	2	1	0	3	20	0	0	0	0
184	0	1	51	163	1.63	58.5	22.0181	0	0	1	6	2	0	2	0	1	1	20	0	0	0	0
185	0	1	57	159	1.59	56	22.151	0	0	2	5	4	1	2	0	1	1	15	0	0	0	0
186	0	1	37	162	1.62	55	20.9572	0	0	1	6	3	1	2	0	1	2	13	0	0	0	0
187	0	1	52	158	1.58	52	20.83	0	0	1	15	2	2	2	0	0	3	20	0	0	0	0
188	0	1	55	165	1.65	60	22.0386	0	0	1	8	3	0	2	0	1	1	12	0	0	0	0
189	0	0	62	167	1.67	65	23.3067	1	1	2	16	33	2	2	1	0	5 & 3	15	0	0	0	0
190	0	0	66	180	1.8	78	24.0741	0	0	1	8	3	0	2	0	0	1	43	0	0	0	0
191	0	1	43	164	1.64	58.5	21.7504	0	0	1	10	4	0	2	0	0	2	12	0	0	0	0
192	0	1	66	161	1.61	53	20.4467	0	1	1	8	30	0	2	0	1	2	12	0	0	0	0
193	0	1	43	161	1.61	55	21.2183	0	0	1	8	3	0	2	0	1	1	45	0	0	0	0
194	0	1	59	158	1.58	55.5	22.232	0	0	1	10	15	0	2	1	1	2	17	0	0	0	0
195	0	0	55	175	1.75	75	24.4898	1	0	1	9	0	2	2	0	0	3	20	0	0	0	0
196	0	1	34	164	1.64	67.5	25.0967	0	0	1	5	10.83	1	2	0	2	2	30	0	0	0	0
197	0	0	60	172	1.72	74	25.0135	1	0	1	18	15	1	2	0	1	3	50	0	0	0	0
198	0	1	37	160	1.6	60	23.4375	0	0	2	8	15.52	0	2	0	1	1	20	0	0	0	0
199	0	1	50	163	1.63	64	24.0882	0	0	1	5	5.57	0	2	0	1	1	20	0	0	0	0
200	0	1	72	157	1.57	52	21.0962	0	0	1	23	0	1	2	0	0	6	25	0	0	0	0
201	0	1	72	157	1.57	62	25.1532	0	1	1	12	2	2	2	0	0	3	20	0	0	0	0
202	0	0	53	167	1.67	65	23.3067	0	0	1	10	2	1	2	0	0	3	20	0	0	0	0
203	0	1	60	163	1.63	45	16.937	0	0	1	10	2	1	2	0	1	2	20	0	0	0	0
204	0	1	36	162	1.62	50	19.052	0	0	1	5	3	1	2	0	1	2	15	0	0	0	0
205	0	1	66	161	1.61	52	20.061	0	0	1	7	21.38	1	2	0	0	1	20	0	0	0	0
206	0	1	66	160	1.6	57.5	22.4609	0	0	1	7	1	0	2	0	1	2	10	0	0	0	0
207	0	1	70	152	1.52	55	23.8054	0	0	1	11	4	1	2	0	0	3	20	0	0	0	0
208	0	1	53	156	1.56	59	24.2439	0	0	2	8	4.85	1	2	0	1	1	20	0	0	0	0
209	0	1	65	158	1.58	64	25.6369	0	0	1	12	0	1	2	0	1	3	22	0	0	0	0
210	0	1	65	161	1.61	54	20.8325	0	0	1	10	0	1	2	0	0	3	20	0	0	0	0
211	0	1	62	160	1.6	60	23.4375	0	0	1	17	0	1	2	1	1	3	21	0	0	0	0
212	0	1	63	158	1.58	64	25.6369	0	1	1	6	3	1	2	0	0	3	15	0	0	0	0
213	0	1	59	164	1.64	75	27.8852	0	1	1	13	4	1	2	0	0	2	30	0	0	0	0
214	0	1	57	147	1.47	46	21.2874	0	1	1	6	4	1	2	0	1	2	18	0	0	0	0
215	0	1	52	158	1.58	56	22.4323	0	0	2	4	8.18	0	3	0	2	1 & 0	15	0	0	0	0
216	0	1	64	154	1.54	47.5	20.0287	0	0	1	6	0	1	3	0	0	3	20	0	0	0	0
217	0	1	65	162	1.62	60	22.8624	0	0	1	11	33.2	1	3	1	1	3	28	0	0	0	0
218	0	1	37	150	1.5	43	19.1111	0	0	1	7	8	1	3	0	0	2	15	0	0	0	0
219	0	1	48	158	1.58	54	21.6311	0	1	1	12	0	1	3	0	0	3	15	0	0	0	0
220	0	1	45	165	1.65	62	22.7732	0	1	1	6	6	1	3	0	0	2	15	0	0	0	0
221	0	1	50	160	1.6	53	20.7031	0	0	1	17	11.08	1	3	0	1	3	10	0	0	0	0
222	0	1	40	160	1.6	58	22.6562	0	0	1	11	5.11	1	3	0	1	1	35	0	0	0	0
223	0	0	38	175	1.75	70	22.8571	0	0	1	3	4.26	1	3	0	0	1	10	0	0	0	0
224	0	1	54	159	1.59	55	21.7555	0	0	1	15	5.1	1	3	0	0	1	10	0	0	0	0
225	0	1	45	160	1.6	52.5	20.5078	0	0	1	6	1	1	3	0	1	3	13	0	0	0	0
226	0	1	69	158	1.58	70	28.0404	0	0	2	7	9.1	1	3	1	0	0 & 1	11	0	0	0	0
227	0	0	52	172	1.72	67	22.6474	0	0	1	6	3.05	1	3	0	1	3	45	0	0	0	0
228	0	0	39	175	1.75	72	23.5102	0	0	1	3	3.97	1	3	0	1	1	15	0	0	0	0
229	0	1	57	162	1.62	67.5	25.7202	0	0	1	13	0	1	3	0	1	1	5	0	0	0	0
230	0	0	49	174	1.74	74	24.4418	0	1	1	11	13.94	1	3	1	1	3	22	0	0	0	0
231	0	1	66	156	1.56	49	20.1348	0	0	1	15	0	1	3	0	0	2	20	0	0	0	0
232	0	0	57	152	1.52	64	27.7008	0	0	1	19	3	1	3	1	0	3	20	0	0	0	0
233	0	1	59	155	1.55	53	22.0604	0	0	2	11	3	0	3	0	1	3	28	0	0	0	0
234	0	0	45	167	1.67	67.5	24.2031	1	0	1	15	3	1	3	0	1	5	20	0	0	0	0
235	0	0	32	180	1.8	80	24.6914	0	1	1	6	11.68	1	3	0	1	2	25	0	0	0	0
236	0	1	46	158	1.58	57.5	23.0332	0	0	1	9	8.7	1	3	0	1	1	40	0	0	0	0
237	0	1	47	168	1.68	62	21.9671	0	0	1	8	2	1	3	0	0	5	20	0	0	0	0
238	0	0	73	178	1.78	84	26.5118	0	0	1	5	7.45	1	3	0	0	2	15	0	0	0	0
239	0	0	25	181	1.81	105	32.0503	0	0	1	10	11.44	1	3	0	0	5	15	0	0	0	0
240	0	1	35	164	1.64	47	17.4747	0	0	1	7	0	0	3	0	0	1	15	0	0	0	0
241	0	0	60	165	1.65	80	29.3848	0	0	1	25	0	2	3	0	1	3	25	0	0	0	0
242	0	0	70	172	1.72	60	20.2812	0	0	2	15	0	1	3	0	1	3	5	0	0	0	0
243	0	1	69	148	1.48	60	27.3923	0	0	1	15	7	1	3	1	0	2	20	0	0	0	0
244	0	0	54	172	1.72	81	27.3797	0	0	1	15	0	1	3	0	1	2	13	0	0	0	0
245	0	1	55	158	1.58	57	22.8329	0	0	1	6	4	2	3	0	1	5	15	0	0	0	0
246	0	1	59	155	1.55	60	24.974	0	0	1	8	30	2	3	0	1	2	3	0	0	0	0
247	0	0	53	175	1.75	86	28.0816	0	0	2	8	17.23	1	3	1	0	0	12	0	0	0	0
248	0	1	42	162	1.62	58	22.1003	0	0	1	30	16.03	2	3	1	2	3	20	0	0	0	0
249	0	0	64	169	1.69	69	24.1588	1	0	1	9	2	1	3	0	1	3	60	0	0	0	0
250	0	0	46	168	1.68	57.5	20.3727	0	0	2	6	15.92	0	3	0	0	1	15	0	0	0	0
251	0	1	50	163	1.63	64	24.0882	0	0	1	9	11.59	0	3	0	1	1	20	0	0	0	0
252	0	1	55	157	1.57	51	20.6905	0	0	1	6	0	0	3	0	1	3	23	0	0	0	0
253	0	1	37	158	1.58	55	22.0317	0	0	2	7	3	0	3	0	0	1 & 2	18	0	0	0	0
254	0	1	66	162	1.62	45	17.1468	0	0	2	9	7.89	1	3	0	0	2	25	0	0	0	0
255	1	0	48	172	1.72	70	23.6614	0	0	1	6	3	0	0	0	0	3	8	0	0	0	1
256	1	0	44	176	1.76	69	22.2753	0	0	1	5	3	0	0	0	0	3	10	0	0	0	1
257	1	1	35	166	1.66	66	23.9512	0	0	2	6	3	0	0	0	0	3	25	0	0	0	1
258	1	1	61	164	1.64	74	27.5134	0	0	2	5	5.81	0	0	0	1	2	10	0	0	0	1
259	1	0	66	164	1.64	71	26.398	0	0	1	10	5	1	0	0	0	3	15	0	0	0	1
260	1	1	68	165	1.65	71	26.079	0	0	1	3	4	0	0	0	0	5	11	0	0	0	1
261	1	1	41	152	1.52	45	19.4771	0	0	1	8	7.41	1	1	0	1	3	5	0	1	1	0
262	1	1	48	158	1.58	52	20.83	0	0	1	8	3	1	3	0	1	2	15	0	1	1	0
263	1	1	58	166	1.66	55	19.9594	0	0	1	8	3	0	0	0	0	3	21	0	0	1	0
264	1	1	52	153	1.53	51	21.7865	0	0	2	3	4	0	1	0	0	0 & 3	20	0	1	0	0
265	1	1	44	162	1.62	57	21.7193	0	0	1	5	19.85	0	0	0	1	1	30	0	0	0	0
266	1	0	39	170	1.7	87	30.1038	0	0	1	7	18.4	1	0	0	1	5	30	0	0	0	0
267	1	1	57	160	1.6	65	25.3906	0	0	1	9	24.39	1	0	0	1	1	25	0	0	0	0
268	1	1	25	163	1.63	57	21.4536	0	1	1	5	15.98	0	0	0	0	2	13	0	0	0	0
269	1	1	56	158	1.58	59	23.634	1	0	1	7	17.7	0	0	0	0	1	22	0	0	0	0
270	1	0	36	170	1.7	55	19.0311	2	0	1	6	5	0	0	0	0	5	35	0	0	0	0
271	1	1	60	158	1.58	49	19.6283	0	0	1	13	28.41	1	0	0	1	2	13	0	0	0	0
272	1	1	55	158	1.58	55	22.0317	0	0	1	10	6	1	0	0	0	2	12	0	0	0	0
273	1	1	47	153	1.53	47	20.0777	0	0	2	4	5.16	0	0	0	0	1 & 3	20	0	0	0	0
274	1	1	43	170	1.7	58	20.0692	0	0	1	9	3	1	0	0	0	5	15	0	0	0	0
275	1	1	53	167	1.67	52	18.6453	0	1	3	8	5	0	0	0	0	2	28	0	0	0	0
276	1	1	53	158	1.58	54	21.6311	0	0	1	9	6	1	0	0	0	2	11	0	0	0	0
277	1	0	62	169	1.69	80	28.0102	2	0	2	7	30.23	1	0	0	1	1 & 2	5	0	0	0	0
278	1	0	34	192	1.92	98	26.5842	0	0	2	5	3	1	0	0	0	1 & 2	15	0	0	0	0
279	1	0	70	170	1.7	80	27.6817	0	0	1	9	14	1	0	0	1	2	10	1	0	0	0
280	1	0	36	170	1.7	55	19.0311	2	0	1	6	4	0	0	0	0	5	35	0	0	0	0
281	1	0	45	170	1.7	72	24.9135	0	0	1	8	17.3	1	0	0	1	2	15	1	0	0	0
282	1	1	55	158	1.58	55	22.0317	0	0	1	10	8	1	0	0	0	2	12	0	0	0	0
283	1	0	60	170	1.7	72	24.9135	0	0	1	10	3	1	0	0	1	1	25	0	0	0	0
284	1	1	48	156	1.56	60	24.6548	0	0	1	15	4	1	0	0	1	1	25	0	0	0	0
285	1	1	70	165	1.65	64	23.5078	0	0	2	5	1	1	0	0	1	1 & 2	15	0	0	0	0
286	1	0	58	177	1.77	77	24.5779	0	0	2	15	4	0	0	0	0	1 & 2	60	0	0	0	0
287	1	1	49	165	1.65	50	18.3655	0	0	1	13	22.6	1	0	0	1	3	14	0	0	0	0
288	1	1	47	161	1.61	58	22.3757	0	1	2	9	4	0	0	0	1	1	20	0	0	0	0
289	1	0	57	165	1.65	78	28.6501	1	1	1	8	4	1	0	0	1	3	32	0	0	0	0
290	1	1	68	162	1.62	46	17.5278	1	0	1	8	18	2	0	0	0	3	20	0	0	0	0
291	1	1	59	168	1.68	65	23.03	0	0	1	7	0	1	0	0	0	0 & 2	30	0	0	0	0
292	1	1	53	168	1.68	63	22.3214	0	0	1	10	18.3	1	0	0	1	1	14	0	0	0	0
293	1	1	68	164	1.64	50	18.5901	0	0	1	8	8.96	1	0	0	1	3	30	0	0	0	0
294	1	1	61	170	1.7	73	25.2595	0	0	1	8	13.8	1	0	0	1	2	23	0	0	0	0
295	1	1	48	148	1.48	59	26.9357	0	0	1	9	0	1	0	0	0	3	20	0	0	0	0
296	1	1	31	156	1.56	50	20.5457	0	0	1	6	15.56	1	0	0	1	2	20	0	0	0	0
297	1	0	53	174	1.74	72.5	23.9464	0	0	1	25	0	1	0	0	0	2	15	0	0	0	0
298	1	1	65	162	1.62	60	22.8624	0	0	2	2	0	1	0	0	1	0 & 3	12	0	0	0	0
299	1	0	44	165	1.65	63	23.1405	0	0	1	9	24	1	0	0	1	2	12	0	0	0	0
300	1	1	68	158	1.58	48	19.2277	0	0	1	8	11	0	0	0	1	2	16	0	0	0	0
301	1	0	42	168	1.68	67	23.7387	0	1	1	5	0	1	0	0	0	1	11	0	0	0	0
302	1	0	50	173	1.73	68	22.7204	0	1	1	8	0	1	0	0	0	1	32	0	0	0	0
303	1	1	61	157	1.57	62	25.1532	0	0	1	9	13.44	1	0	1	1	2	30	0	0	0	0
304	1	1	29	158	1.58	48	19.2277	0	0	1	8	0	1	0	0	0	1	11	0	0	0	0
305	1	1	54	167	1.67	57	20.4382	0	0	1	8	4	1	0	0	0	2	13	0	0	0	0
306	1	0	43	162	1.62	62	23.6244	0	0	1	10	2	0	1	0	0	3	20	0	0	0	0
307	1	1	62	174	1.74	75	24.7721	0	0	1	10	2	2	1	0	0	2	19	0	0	0	0
308	1	1	39	162	1.62	60	22.8624	0	0	1	15	0	0	1	0	0	3	20	0	0	0	0
309	1	1	36	165	1.65	54	19.8347	0	0	1	8	4.84	1	1	0	0	3	20	0	0	0	0
310	1	0	53	164	1.64	78	29.0006	0	0	2	12	6.27	1	1	0	1	3	40	0	0	0	0
311	1	1	53	161	1.61	56	21.6041	0	0	1	15	11.83	2	1	0	0	6	6	0	0	0	0
312	1	1	52	164	1.64	55	20.4491	0	0	2	10	18.54	1	1	0	1	2	25	1	0	0	0
313	1	1	52	150	1.5	54	24	0	0	1	18	28.17	1	1	1	0	3	15	1	0	0	0
314	1	1	38	168	1.68	58	20.5499	0	0	1	5	0	0	1	0	0	5	5	0	0	0	0
315	1	1	51	164	1.64	68	25.2826	0	0	1	6	11.8	1	1	0	0	2	6	0	0	0	0
316	1	1	36	160	1.6	58	22.6562	0	0	3	9	0	1	1	0	0	2	8	0	0	0	0
317	1	1	67	162	1.62	55	20.9572	0	1	2	3	9.23	1	1	1	0	2 & 5	10	0	0	0	0
318	1	0	64	161	1.61	58	22.3757	0	0	1	5	0	1	1	0	1	1	25	0	0	0	0
319	1	1	42	160	1.6	65	25.3906	0	0	1	7	21.08	1	1	1	1	2	12	0	0	0	0
320	1	0	58	175	1.75	81	26.449	0	0	1	12	23	1	1	0	1	1	20	0	0	0	0
321	1	1	43	162	1.62	55	20.9572	0	0	1	7	0	0	1	0	0	1	22	0	0	0	0
322	1	1	54	156	1.56	53	21.7784	0	0	1	8	13.08	1	1	0	1	5	25	0	0	0	0
323	1	1	32	163	1.63	51	19.1953	0	0	1	7	2	0	1	0	1	2	17	0	0	0	0
324	1	1	44	153	1.53	53	22.6409	0	0	1	5	10	2	1	0	1	1	22	1	0	0	0
325	1	1	28	168	1.68	53	18.7783	0	0	1	7	0	1	1	0	1	1	22	1	0	0	0
326	1	1	41	160	1.6	47	18.3594	0	0	1	6	4	1	1	0	1	1	22	0	0	0	0
327	1	0	30	172	1.72	75	25.3515	0	1	1	5	3	0	1	0	1	1	20	0	0	0	0
328	1	0	64	178	1.78	70	22.0932	1	0	1	15	4	1	1	0	1	2	15	1	0	0	0
329	1	1	59	158	1.58	54	21.6311	0	0	1	7	30	1	1	0	0	2	15	0	0	0	0
330	1	0	66	166	1.66	54	19.5965	2	0	1	13	10	1	1	0	1	2	12	0	0	0	0
331	1	0	30	168	1.68	52	18.424	2	0	1	7	4	0	1	0	0	0	23	0	0	0	0
332	1	1	45	162	1.62	63	24.0055	0	0	1	4	4	0	2	0	0	1	20	0	0	0	0
333	1	1	49	158	1.58	53	21.2306	0	0	1	5	13.57	0	2	0	1	1	15	0	0	0	0
334	1	1	48	161	1.61	67	25.8478	0	0	1	9	6.52	1	2	0	0	3	60	0	0	0	0
335	1	1	60	170	1.7	71	24.5675	0	0	2	3	4	1	2	0	0	0 & 2	12	1	0	0	0
336	1	0	61	163	1.63	60	22.5827	0	0	2	8	20	0	2	0	0	3	5	0	0	0	0
337	1	1	42	164	1.64	70	26.0262	0	0	1	10	4	1	2	0	0	3	5	0	0	0	0
338	1	1	59	162	1.62	57	21.7193	0	0	1	2	4	0	2	0	0	5	5	0	0	0	0
339	1	1	51	160	1.6	55	21.4844	0	0	1	12	6.93	1	2	0	0	2	7	1	0	0	0
340	1	1	61	155	1.55	47	19.563	0	0	2	5	4.74	0	2	0	0	1	12	0	0	0	0
341	1	1	36	151	1.51	50	21.9289	0	0	1	8	4	0	2	0	0	2	20	0	0	0	0
342	1	1	51	160	1.6	55	21.4844	0	0	1	12	15	0	2	0	1	2	30	1	0	0	0
343	1	1	53	163	1.63	60	22.5827	0	0	1	6	5	0	2	0	0	1	20	0	0	0	0
344	1	1	48	158	1.58	65	26.0375	0	0	3	6	2	1	2	0	1	2	40	0	0	0	0
345	1	1	42	161	1.61	53	20.4467	0	0	1	8	4	0	2	0	1	2	40	0	0	0	0
346	1	1	43	160	1.6	57	22.2656	0	0	1	7	2	0	2	0	0	1	15	0	0	0	0
347	1	1	30	158	1.58	51	20.4294	0	0	1	4	4	0	2	0	1	1	14	0	0	0	0
348	1	0	70	175	1.75	75	24.4898	1	0	1	10	8	0	2	0	1	1	30	0	0	0	0
349	1	0	51	178	1.78	85	26.8274	0	0	1	6	20	2	2	0	0	5	15	0	0	0	0
350	1	0	51	172	1.72	68	22.9854	0	0	1	7	1	0	2	0	1	2	40	0	0	0	0
351	1	1	40	160	1.6	46	17.9687	0	0	1	8	2	1	2	0	0	1	30	0	0	0	0
352	1	0	57	170	1.7	70	24.2215	1	1	1	8	23	1	2	1	1	1	50	0	0	0	0
353	1	1	53	147	1.47	47.5	21.9816	0	1	1	5	3	0	2	0	1	1	17	1	0	0	0
354	1	0	41	178	1.78	80	25.2493	2	0	2	7	10	0	2	0	1	0 & 1	63	0	0	0	0
355	1	1	40	160	1.6	61	23.8281	0	0	2	7	17	0	2	0	0	1	20	0	0	0	0
356	1	0	67	176	1.76	87	28.0863	0	0	1	7	0	0	2	0	1	1	30	0	0	0	0
357	1	1	63	159	1.59	69	27.2932	0	0	1	10	8.25	1	2	0	1	3	25	0	0	0	0
358	1	1	46	161	1.61	54	20.8325	0	0	1	5	25.7	1	2	0	0	1	30	0	0	0	0
359	1	0	51	173	1.73	70	23.3887	2	0	1	8	10.9	1	2	0	1	1	5	1	0	0	0
360	1	0	43	170	1.7	60	20.7612	0	0	1	7	16.23	1	2	0	1	2	35	0	0	0	0
361	1	1	65	158	1.58	56.5	22.6326	0	0	1	9	26.05	1	2	1	1	3	18	0	0	0	0
362	1	1	31	165	1.65	57	20.9366	0	0	1	8	4	1	2	0	1	2	45	0	0	0	0
363	1	1	57	155	1.55	64	26.6389	0	0	1	19	0	1	2	0	0	3	7	0	0	0	0
364	1	0	50	176	1.76	73.5	23.728	1	0	1	11	25.8	1	2	1	1	1	25	0	0	0	0
365	1	1	49	158	1.58	65	26.0375	0	0	1	9	14.5	1	2	0	1	1	22	0	0	0	0
366	1	0	34	184	1.84	72.5	21.4142	0	0	1	7	0	0	2	0	1	2	28	0	0	0	0
367	1	0	55	170	1.7	78	26.9896	0	0	1	8	14.5	1	3	1	0	3	10	0	0	0	0
368	1	1	64	163	1.63	86	32.3685	0	1	1	6	5	1	3	0	0	2	18	0	0	0	0
369	1	1	59	165.5	1.655	77	28.1122	0	0	1	5	0	1	3	0	0	2	20	0	0	0	0
370	1	1	48	159	1.59	60	23.7332	0	0	1	12	6.19	0	3	0	1	2	15	0	0	0	0
371	1	0	69	165	1.65	68	24.977	0	0	1	21	12	1	3	1	0	3	30	0	0	0	0
372	1	1	52	157	1.57	60	24.3418	0	0	1	5	22.5	0	3	0	0	1	25	0	0	0	0
373	1	1	45	161	1.61	55	21.2183	0	0	1	7	0	1	3	0	1	1	15	0	0	0	0
374	1	1	52	158	1.58	52	20.83	0	0	1	10	0	1	3	0	1	2	40	0	0	0	0
375	1	1	53	160	1.6	54	21.0937	0	0	1	15	0	1	3	0	1	3	22	0	0	0	0
376	1	1	67	153	1.53	55	23.4952	0	0	2	5	20	1	0 & 1	0	1	2	10	0	0	0	0
377	1	0	54	167	1.67	75	26.8923	1	1	2	5	10	1	0 & 1	0	0	2 & 3	20	0	0	0	0
378	1	1	51	163	1.63	59	22.2063	0	1	2	13	2	1	1 & 2	0	0	2 & 3	15	0	0	0	0
